# Supplementary material for: An efficient planar-heterojunction solar cell based on wide-bandgap CH3NH3PbI2.1Br0.9 perovskite film for tandem cell application
Source: Royal Society of Chemistry journal article supplement (doi:10.1039/c5cc07673k), 2015-10-15
Supplement: c5cc07673k1.pdf [file c5cc07673k1.pdf]

## Supplementary Information

### An efficient planar-heterojunction solar cell based on wide-bandgap

### CH<sub>3</sub>NH<sub>3</sub>PbI<sub>2.1</sub>Br<sub>0.9</sub> perovskite film for tandem cell application

Weidong Zhu,<sup>a</sup> Chunxiong Bao,<sup>a</sup> Faming Li,<sup>a</sup> Xiaoxin Zhou,<sup>a</sup> Jie Yang,<sup>a</sup> Tao Yu,<sup>\*abc</sup>  
and Zhigang Zou<sup>abc</sup>

<sup>a</sup>National Laboratory of Solid State Microstructures & Eco-Materials and Renewable Energy  
Research Center (ERERC) at Department of Physics, Nanjing University, Nanjing 210093, P. R.  
China. E-mail: yutao@nju.edu.cn

<sup>b</sup>Collaborative Innovation Center of Advanced Microstructures, Nanjing University, Nanjing  
210093, P. R. China.

<sup>c</sup>Jiangsu Key Laboratory for Nano Technology, Nanjing 210093, P. R. China.

#### Experimental details:

##### Materials

Lead iodide (PbI<sub>2</sub>, 99.999%), Li-bis-(trifluoromethanesulfonyl) imide (Li-TFSI, 98%), dimethylformamide (DMF, anhydrous 99.5%), and 4-tert-butylpyridine (TBP, 98%) were purchased from Aladdin Reagents. Hydroiodic acid (47 wt % in water), hydrobromic acid (48 wt % in water) and methylamine (33 wt% in absolute ethanol) were purchased from Sigma-Aldrich. Diethanolamine, isopropanol (IPA), chlorobenzene, acetonitrile, tetrabutyl titanate and were purchased from Sinopharm Chemical Reagent Co., Ltd. (China). 2,2',7,7'-tetrakis (N,N-di-p-methoxyphenylamine)-9,9'-spirobifluorene (Spiro-MeOTAD, ≥99%) was purchased from Shenzhen Feiming Science and Technology Co., Ltd. (China). CH<sub>3</sub>NH<sub>3</sub>Br (MABr) and CH<sub>3</sub>NH<sub>3</sub>I (MAI) were synthesized by the recipe reported previously.

##### Solar cell fabrication

*Preparation of the TiO<sub>2</sub> films:* Fluorine-doped tin oxide (FTO) glass substrates with sheet resistance of about 14 Ω sq<sup>-1</sup> were cleaned by ultrasonic washing in detergent solution, acetone, absolute alcohol, and deionized water for 30 min in succession, and then cleaned by UV-ozone treatment for 15 min. 30 μL TiO<sub>2</sub> sol was spin-coated on the pre-cleaned substrates to form compact TiO<sub>2</sub> layer with the thickness of about 60

nm by annealing at 480 °C for 40 min in air.

*Preparation of  $\text{CH}_3\text{NH}_3\text{PbI}_3$  (MAPbI<sub>3</sub>) films and halide exchange with Br:* 461 mg PbI<sub>2</sub> was dissolved in 1 mL DMF under vigorous stirring at 70 °C. The solution was spin-coated on the TiO<sub>2</sub> films at 3000 rpm for 30 s. After spinning, the films were dried at 70 °C for 5 min and then 95 °C for 15 min. To convert the PbI<sub>2</sub> layer to MAPbI<sub>3</sub>, the MAI solution in IPA with the concentration of 45 mg mL<sup>-1</sup> was spun on the top of PbI<sub>2</sub> layer at 3000 rpm for 20 s. The samples were then put on the top of a hot plate with the temperature of 100 °C and covered by a glass petri dish. During this process, 10 µL of DMF solvent was added at the edge of the petri dish the film. After about 90 min, the samples were cooled down to room temperature. Thus the sample MAPbI<sub>3</sub> films were obtained. In the halide exchange process, the obtained MAPbI<sub>3</sub> films were dipped in the solution of MABr in IPA (5 mg/mL) for various durations at room temperature. After that, they were then annealed at 100 °C for 5 min to obtain the MAPbI<sub>3-x</sub>Br<sub>x</sub> films. When the dipping time was 120 s, the MAPbI<sub>3-x</sub>Br<sub>x</sub> film with the bandgap of 1.75 eV can be obtained.

*Preparation of MAPbI<sub>2.1</sub>Br<sub>0.9</sub> film by solvent annealing-induced interdiffusion process:* 461 mg PbI<sub>2</sub> was dissolved in 1 mL DMF under vigorous stirring at 70 °C. The solution was spin-coated on the TiO<sub>2</sub> film at 3000 rpm for 30 s. After spinning, the film was dried at 70 °C for 5 min and then 95 °C for 15 min. To convert the PbI<sub>2</sub> layer to MAPbI<sub>2.1</sub>Br<sub>0.9</sub> film, 45 mg mL<sup>-1</sup> MAI: MABr blended solution in IPA with 50 wt% MABr was spun on the top of PbI<sub>2</sub> layer at 3000 rpm for 20 s. The sample was then put on top of a hot plate with the temperature of 100 °C and covered by a glass petri dish. During this process, 10 µL of DMF solvent was added at the edge of the petri dish the film. After about 90 min, the sample was cooled down to room temperature. Thus the MAPbI<sub>2.1</sub>Br<sub>0.9</sub> film with the bandgap of 1.75 eV was attained.

*Fabrication of Devices:* 72.3 mg spiro-MeOTAD, 28.8 mL TBP and 17.5 µL lithium Li-TFSI in acetonitrile (520 mg/ml) were mixed in 1mL chlorobenzene to form the hole transport material (HTM) solution. Then, the solution was coated on the MAPbI<sub>2.1</sub>Br<sub>0.9</sub> film to form HTM layer by spin-coating at 3000 rpm for 30 s. After being preserved in dark in dry box for 24 h, the Ag counter electrode with the

thickness of about 100 nm and the area of 0.28 cm<sup>2</sup> was deposited on the top HTM layer by thermal evaporation technique.

### **Characterizations**

A FEI NOVA NanoSEM230 scanning electron microscopy (SEM) was employed to characterize the morphological properties of the samples. X-Ray diffraction (XRD) patterns were collected on a Rigaku Ultima III X-ray diffractometer (Cu K $\alpha$ ) in the range of 10°-60°. A Shimadzu UV-2550 UV-vis spectrometer fitted with an integrating sphere was used to investigate the absorption properties of the samples. Time-resolved photoluminescence (PL) decay property was obtained using the time-correlated single-photon counting technique (PicoHarp 300). The samples were photoexcited using a laser beam pulsed at 5 MHz. The incident photon conversion efficiency (IPCE) was measured using a 150 W xenon lamp (Oriel) fitted with a monochromator (Cornerstone 74004) as a monochromatic light source. The J-V curves of the fabricated solar cells were carried on a Keithley 2400 source measurement unit under AM1.5 illumination (standard 100 mW cm<sup>-2</sup>) cast by an Oriel 92251A-1000 sunlight simulator calibrated by the standard reference of a Newport silicon solar cell. A black mask with a circular aperture (0.09 cm<sup>2</sup>) was applied on top of the solar cell.

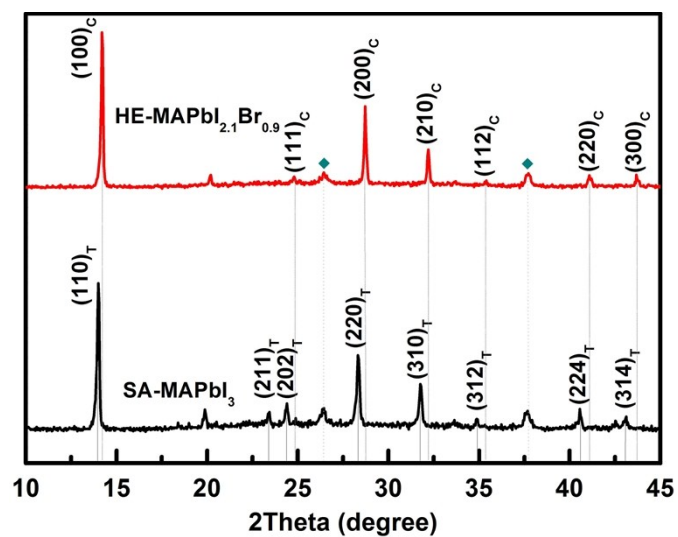

**Fig. S1** The comparison of XRD patterns of the parent MAPbI<sub>3</sub> film (SA-MAPbI<sub>3</sub>) with the MAPbI<sub>2.1</sub>Br<sub>0.9</sub> films prepared by halide exchange (HE-MAPbI<sub>2.1</sub>Br<sub>0.9</sub>). The subscript “C” and “T” of the indices of lattice planes represent the cubic and tetragonal perovskite phase, respectively.

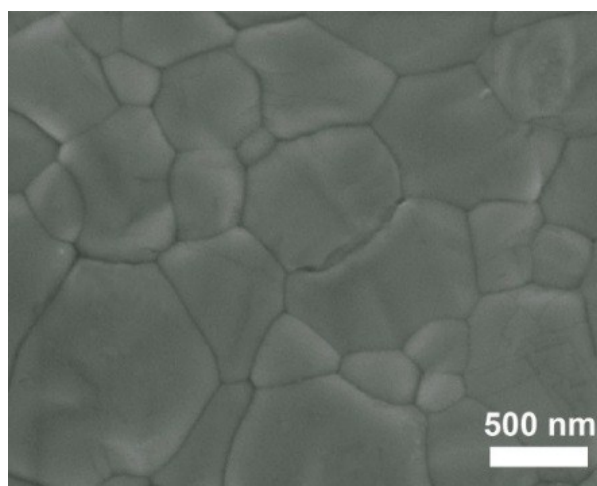

**Fig. S2** The surface SEM images of the parent MAPbI<sub>3</sub> film prepared by solvent annealing-induced interdiffusion process.
